# Supplementary material
Source: publisher figshare collection journal article supplement (https://frontiersin.figshare.com/ndownloader/files/11707367)
Supplement: Supplementary file [file 11707367]

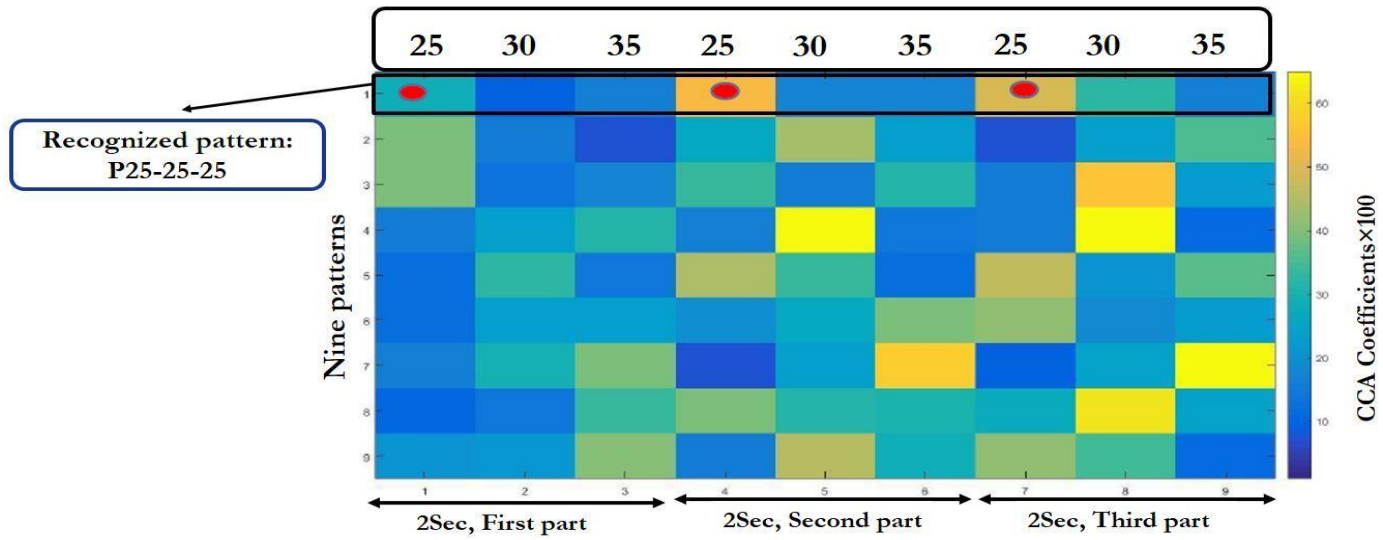

**Supplementary figure S3: Targeted pattern recognition for single subject according the coefficient matrix and output of the classifier. For P25-25-25, the classifier determined the pattern correctly. For each row all the 9 patterns are labeled as 0 and 1 and then accuracy was calculated according to Eq11.**
